# Supplementary material for: Hajdu-Cheney Syndrome: A Novel NOTCH2 Mutation in a Spanish Child in Treatment with Vibrotherapy: A Case Report
Source: MDPI journal article supplement (doi:10.3390/jcm11175205), 2022-09-02
Supplement: s1 [file s1]

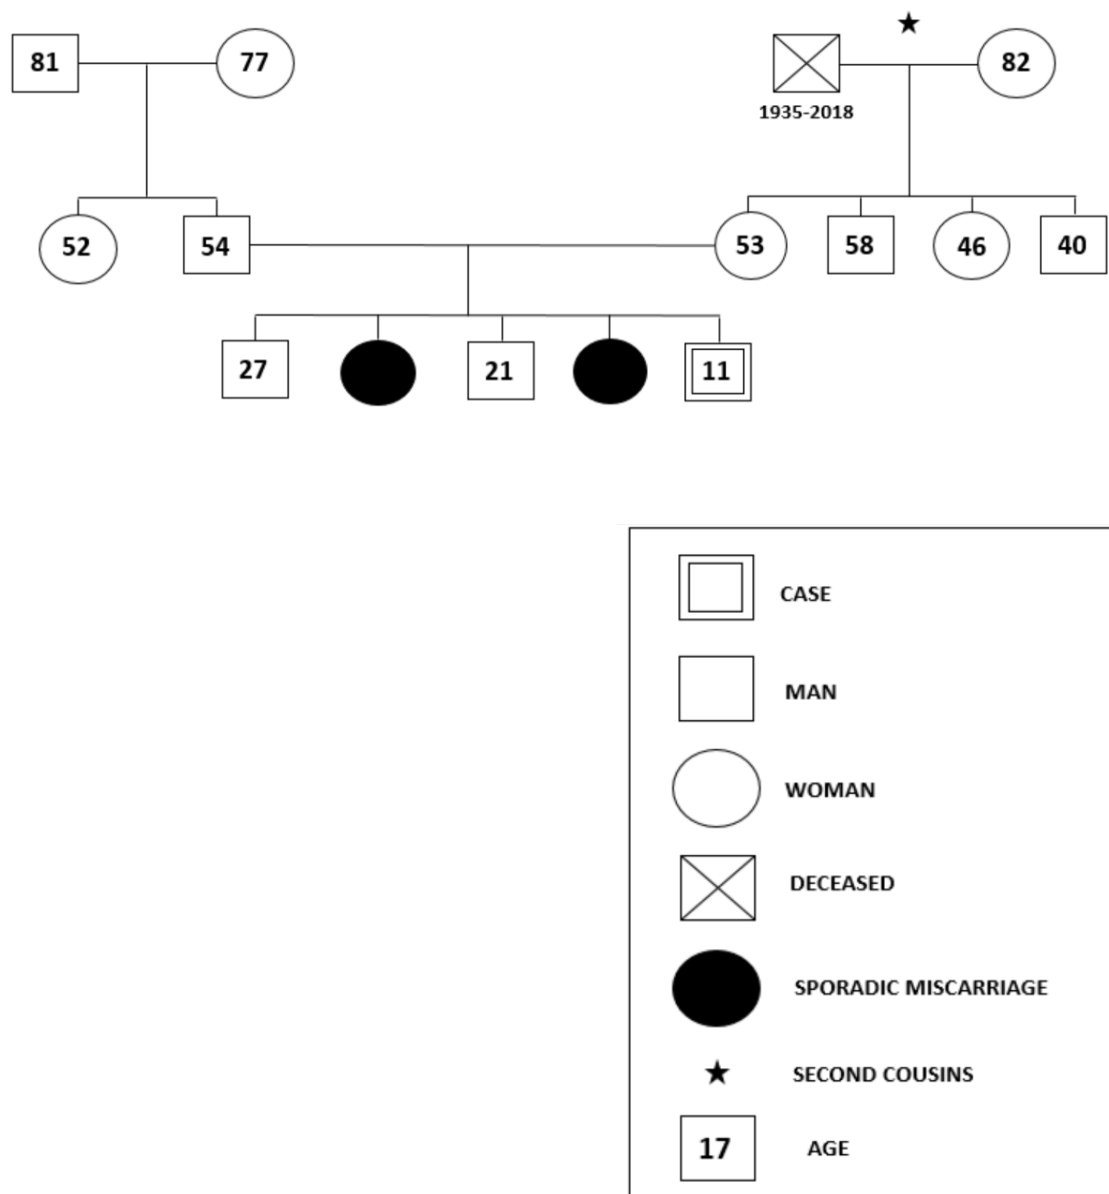

**Figure S1:** Family genogram.

**Table S1:** List of the most relevant published cases of Hajdu-Cheney syndrome in pediatric age (less than 15 years old).

| AUTHOR                  | ARTICLE                                                                                                                                                   | YEAR OF PUBLICATION | PATIENT NUMBER | PATIENT'S AGE | SEX    | COUNTRY       |
|-------------------------|-----------------------------------------------------------------------------------------------------------------------------------------------------------|---------------------|----------------|---------------|--------|---------------|
| Shurtleff DB et al. [1] | <i>Hereditary Osteolysis With Hypertension and Nephropathy.</i>                                                                                           | 1964                | 1              | 4             | MALE   | UNITED STATES |
|                         |                                                                                                                                                           |                     | 2              | 6             | FEMALE | UNITED STATES |
|                         |                                                                                                                                                           |                     | 3              | 8             | FEMALE | UNITED STATES |
| Herrmann et al. [2]     | <i>Arthro-Dento-Osteo Dysplasia ( Hajdu-Cheney Syndrome )</i>                                                                                             | 1973                | 4              | 10            | MALE   | UNITED STATES |
| Brown et al. [3]        | <i>The acro-osteolysis syndrome: Morphologic and biochemical studies.</i>                                                                                 | 1976                | 5              | 7             | FEMALE | UNITED STATES |
| Weleber et al. [4]      | <i>The Hajdu-Cheney syndrome Report of two cases and review of the literatura.</i>                                                                        | 1976                | 6              | 12            | FEMALE | UNITED STATES |
|                         |                                                                                                                                                           |                     | 7              | 12            | FEMALE | UNITED STATES |
| Rosenmann et al. [5]    | <i>Sporadic Idiopathic Acro-Osteolysis with Cranio-Skeletal Dysplasia, Polycystic Kidneys and Glomerulonephritis A case of the Hajdu-Cheney syndrome.</i> | 1977                | 8              | 15            | MALE   | ISRAEL        |
| Elias et al. [6]        | <i>Hereditary Osteodysplasia with Acre-Osteolysis (The Hajdu-Cheney Syndrome).</i>                                                                        | 1978                | 9              | 12            | MALE   | UNITED STATES |
| Zeman et al. [7]        | <i>Hajdu-Cheney syndrome in a 3% year old girl.</i>                                                                                                       | 1994                | 10             | 3.5           | FEMALE | AUSTRALIA     |
| Brennan et al. [8]      | <i>Hajdu-Cheney Syndrome: Evolution of Phenotype and Clinical Problems.</i>                                                                               | 2001                | 11             | 5             | FEMALE | UNITED STATES |
|                         |                                                                                                                                                           |                     | 12             | 5             | FEMALE | UNITED STATES |
| Antoniades et al. [9]   | <i>Hajdu-Cheney syndrome (acro-osteolysis): A case report of dental interest.</i>                                                                         | 2003                | 13             | 9             | MALE   | GREECE        |

|                          |                                                                                                                         |      |    |      |        |                |
|--------------------------|-------------------------------------------------------------------------------------------------------------------------|------|----|------|--------|----------------|
| August et al. [10]       | <i>Anesthesia for a child with Hajdu-Cheney syndrome.</i>                                                               | 2009 | 14 | 8    | FEMALE | UNITED STATES  |
| Yamaguchi et al. [11]    | <i>A case report of anesthesia for a child with Hajdu-Cheney syndrome.</i>                                              | 2013 | 15 | 10   | FEMALE | JAPAN          |
| Ventosa et al. [12]      | <i>Acro-osteolysis in a 4 year-old patient: clinical features of Hajdu-Cheney syndrome.</i>                             | 2013 | 16 | 4    | MALE   | SPAIN          |
| Battelino et al. [13]    | <i>End-Stage Renal Disease in an Infant With Hajdu-Cheney Syndrome.</i>                                                 | 2016 | 17 | 8    | MALE   | SLOVENIA       |
| Sakka et al. [14]        | <i>Bone Structural Characteristics and Response to Bisphosphonate Treatment in Children With Hajdu-Cheney Syndrome.</i> | 2017 | 18 | 15   | MALE   | UNITED KINGDOM |
|                          |                                                                                                                         |      | 19 | 6.8  | MALE   | UNITED KINGDOM |
|                          |                                                                                                                         |      | 20 | 7.8  | FEMALE | UNITED KINGDOM |
|                          |                                                                                                                         |      | 21 | 10.8 | FEMALE | UNITED KINGDOM |
|                          |                                                                                                                         |      | 22 | 10   | MALE   | UNITED KINGDOM |
|                          |                                                                                                                         |      | 23 | 13   | FEMALE | UNITED KINGDOM |
|                          |                                                                                                                         |      | 24 | 15   | MALE   | UNITED KINGDOM |
| Ruo-Lan Gong et al. [15] | <i>A Novel Mutation of Notch homolog protein 2 gene in a Chinese Family with Hajdu-Cheney Syndrome.</i>                 | 2017 | 25 | 4    | MALE   | CHINA          |
|                          |                                                                                                                         | 2018 | 26 | 6    | FEMALE | LONDON         |

|                          |                                                                                                                  |      |    |    |        |         |
|--------------------------|------------------------------------------------------------------------------------------------------------------|------|----|----|--------|---------|
| Pittaway et al.<br>[16]  | <i>Bisphosphonate therapy for spinal osteoporosis in Hajdu-Cheney syndrome – new data and literature review.</i> |      | 27 | 8  | FEMALE | LONDON  |
|                          |                                                                                                                  |      | 28 | 11 | FEMALE | LONDON  |
|                          |                                                                                                                  |      | 29 | 15 | FEMALE | LONDON  |
| Graversen et al.<br>[17] | <i>Phenotypic presentations of Hajdu-Cheney syndrome according to age – 5 distinct clinical presentations.</i>   | 2019 | 30 | 10 | FEMALE | DENMARK |
| Jiménez et al. [18]      | <i>Hand Deformities in Hajdu-Cheney Syndrome: A Case Series of 3 Patients Across 3 Consecutive Generations.</i>  | 2020 | 31 | 6  | MALE   | SPAIN   |

#### Supplementary references:

1. Shurtleff, D.B.; Sparkes, R.S.; Clawson, D.K.; Guntheroth, W.G.; Mottet, N.K. Hereditary Osteolysis With Hypertension and Nephropathy. *JAMA J. Am. Med. Assoc.* **1964**, *188*, 363–368, doi:10.1001/jama.1964.03060300025005.
2. Herrmann, J.; Zugibe, F.T.; Gilbert, E.F.; Opitz, J.M. Arthro-Dento-Osteo Dysplasia ( Hajdu-Cheney Syndrome ). *Z. Kinderheilk* **1973**, *114*, 93–110.
3. Brown, D.M.; Bradford, D.S.; Gorlin, R.J.; Desnick, R.J.; Langer, L.O.; Jowsey, J.; Sauk, J.J. The acro-osteolysis syndrome: Morphologic and biochemical studies. *J. Pediatr.* **1976**, *88*, 573–580, doi:10.1016/S0022-3476(76)80009-1.
4. Weleber, R.G.; Rodney K. Beals The Hajdu-Cheney syndrome. Report of two cases and review of the literature. *J. Pediatr.* **1976**, *88*, 243–249.
5. Rosenmann, E.; Penchas, S.; Cohen, T.; Aviad, I. Sporadic idiopathic acro-osteolysis with cranio-skeletal dysplasia, polycystic kidneys and glomerulonephritis A case of the hajdu-cheney syndrome. *Pediatr. Radiol.* **1977**, *6*, 116–120,

doi:10.1007/BF00973535.

6. Elias, A.N.; Pinals, R.S.; Clarke Anderson, H.; Gould, L. V.; Streeten, D.H.P. Hereditary osteodysplasia with acro-osteolysis (the Hajdu-Cheney syndrome). *Am. J. Med.* **1978**, *65*, 627–636, doi:10.1016/0002-9343(78)90851-3.
7. ZEMAN, J.; HOUSTKOVA, H.; KOZLOWSKI, K. Hajdu–Cheney syndrome in a 3 1/2 year old girl. *Australas. Radiol.* **1994**, *38*, 228–230, doi:10.1111/j.1440-1673.1994.tb00183.x.
8. Brennan, A.M.; Pauli, R.M. Hajdu-Cheney syndrome: Evolution of phenotype and clinical problems. *Am. J. Med. Genet.* **2001**, *100*, 292–310, doi:10.1002/1096-8628(20010515)100:4<292::AID-AJMG1308>3.0.CO;2-4.
9. Antoniadou, K.; Kaklamanos, E.; Kavadia, S.; Hatzistilianou, M.; Antoniadou, V. Hajdu-Cheney syndrome (acro-osteolysis): A case report of dental interest. *Oral Surg. Oral Med. Oral Pathol. Oral Radiol. Endod.* **2003**, *95*, 725–731, doi:10.1067/moe.2003.151.
10. August, D.A.; Ramos, D.C. Anesthesia for a child with Hajdu-Cheney syndrome. *Paediatr. Anaesth.* **2009**, *19*, 649–650.
11. Yamaguchi, S.; Nakamura, K.; Takahashi, Y. A case report of anesthesia for a child with Hajdu-Cheney syndrome. *J. Anesth.* **2013**, *27*, 949–950, doi:10.1007/s00540-013-1642-4.
12. Ventosa, P.; Gorina, N.; Balaguer Santamaria, A.; Riera, L.; Casals, I. Acroosteólisis en un paciente de 4 años: datos clínicos del síndrome de Hajdu-Cheney. *An. Pediatr.* **2013**, *79*, 62–63, doi:10.1016/j.anpedi.2012.11.025.
13. Battelino, N.; Writzl, K.; Bratanič, N.; Irving, M.D.; Novljan, G. End-Stage Renal Disease in an Infant With Hajdu-Cheney Syndrome. *Ther. Apher. Dial.* **2016**, *20*, 318–321, doi:10.1111/1744-9987.12444.
14. Sakka, S.; Gafni, R.I.; Davies, J.H.; Clarke, B.; Tebben, P.; Samuels, M.; Saraff, V.; Klaushofer, K.; Fratzl-Zelman, N.; Roschger, P.; et al. Bone Structural Characteristics and Response to Bisphosphonate Treatment in Children With Hajdu-Cheney Syndrome. *J. Clin. Endocrinol. Metab.* **2017**, *102*, 4163–4172, doi:10.1210/jc.2017-01102.
15. Gong, R.L.; Wu, J.; Chen, T.X. A Novel Mutation of Notch homolog protein 2 gene in a Chinese Family with Hajdu-Cheney Syndrome. *Chin. Med. J. (Engl.)* **2017**, *130*, 2883–2884, doi:10.4103/0366-6999.219141.

16. Pittaway, J.F.H.; Harrison, C.; Rhee, Y.; Holder-Espinasse, M.; Fryer, A.E.; Cundy, T.; Drake, W.M.; Irving, M.D. Bisphosphonate therapy for spinal osteoporosis in Hajdu-Cheney syndrome - New data and literature review. *Orphanet J. Rare Dis.* 2018, 13.
17. Graversen, L.; Handrup, M.M.; Irving, M.; Hove, H.; Diness, B.R.; Risom, L.; Svaneby, D.; Aagaard, M.M.; Vogel, I.; Gjørup, H.; et al. Phenotypic presentations of Hajdu-Cheney syndrome according to age – 5 distinct clinical presentations. *Eur. J. Med. Genet.* **2019**, 63, doi:10.1016/j.ejmg.2019.04.007.
18. Jiménez, I.; Medina-Gontier, J.; Caballero, J.; Medina, J. Hand Deformities in Hajdu-Cheney Syndrome: A Case Series of 3 Patients Across 3 Consecutive Generations. *J. Hand Surg. Am.* **2020**, doi:10.1016/j.jhsa.2020.02.012.
